# Supplementary material
Source: PubMed Central journal article supplement (PMC3190764)

## Supplemental Data

### “The role of net charge on the catalytic domain and the influence of the cell-wall binding domain on the bactericidal activity, specificity and host-range of phage lysins”

Lieh Yoon Low, Chen Yang, Marta Perego, Andrei Osterman & Robert Liddington.

**Supplemental Table I.** DNA oligonucleotide sequences used for cloning and mutagenesis in this study.

| Primer                                 | Sequence (5'-3')                                                   |
|----------------------------------------|--------------------------------------------------------------------|
| PlyL E90A forward                      | GAG TCC ATT TCT GTA GCT ATC TGT TAT TCA AAA                        |
| PlyL E90A reverse                      | TTT TGA ATA ACA GAT AGC TAC AGA AAT GGA CTC                        |
| XlyA Full length forward               | AAA GGA GAT ATA <b>CAT ATG</b> GTT AAC ATT ATT CAA GAC TTT ATT     |
| XlyA Full length reverse               | GAA TTC <b>GGA TCC</b> TCA TCA GCT TAA TTG CGC TGC GAT CTT CTC TTT |
| XlyA <sup>cat</sup> (aa157) reverse    | GAA TTC <b>GGA TCC</b> TCA CCC AAT TCC TGC TTT GAA CGA ATC         |
| XlyA D7K                               | CAT ATG GTT AAC ATT ATT CAA AAA TTT ATT CCG GTT GGC GCA AAT        |
| XlyA T22K/L24K                         | CGT CCA GGC TAC GCA ATG AAA CCG AAA TAC ATT ACG GTG CAC            |
| XlyA T63K                              | CAT TTT ACA GTT GAT GAT AAA GAA ATT TAT CAG CAT CTG CCT            |
| XlyA T145K                             | CCG CGA AAA TTG TTA GAT AAA TGG GAT TCG TTC AAA GCA GGA            |
| XlyA E93A forward                      | CGG GCT TCT ATT GGA ATT GCG ATT TGC GAA AAT GCC GAT GGC            |
| XlyA E93A reverse                      | ATC GGC ATT TTC GCA AAT CGC AAT TCC AAT AGA AGC CCG GTT            |
| PlyBa04 Full length forward            | CCG CGC GGC AGC CAT ATG GGA CAT ATT ATT GAT ATT TCA                |
| PlyBa04 <sup>cat</sup> (aa189) reverse | TTA GCA GCC GGA TCC TTA TGC CGA TTC TGT AAA CCA AGA TAG            |
| PlyBa04 Full length reverse            | TTA GCA GCC GGA TCC TTA TTT AAC TTC ATA CCA CCA ACC                |
| Remove NdeI forward                    | GGT TTA TAT GTT GGT CAT CAC ATG TAT ACA CCT TTC GGT                |
| Remove NdeI reverse                    | ACC GAA AGG TGT ATA CAT GTG ATG ACC AAC ATA TAA ACC                |
| PlyBa04 N15D                           | TCA AAA TGG AAT GGC GAT ATT GAC TGG TCT ATA GCG AAA CAA            |
| PlyBa04 G43D                           | TAT GTA GAT CCA CTA TAT AAA GAC TAT GTA CAA GCA ATG AAG            |
| PlyBa04 T128D                          | TTA TAT GTT GGT CAT CAC ATG TAT GAT CCT TTC GGT ATG GCG AAC        |
| PlyBa04 T160D                          | CCT TGC GAT ATT TGG CAA TAT GAT GAA ACG GGT AAT GTA CCT            |
| PlyG_cat forward                       | CGG GGC AGC <b>CAT ATG</b> GAA ATT CAG AAA AAA CTG GTT GAT         |
| PlyG reverse                           | GCA GCC <b>GGA TCC</b> AAT CGC CAC GTT ACC GTT TTT CAC TTT         |

**Bold type** indicates restriction endonuclease site. Underlining indicates mutated base.

**Supplemental Fig. 1** Quality control of XlyA<sup>CAT</sup> and its gain-of-function mutants. **A**, column fractions from final purification step for wild-type and mutant protein. **B & C**, Thermal melting profiles show only small differences in stability, as determined by Differential Scanning Calorimetry.

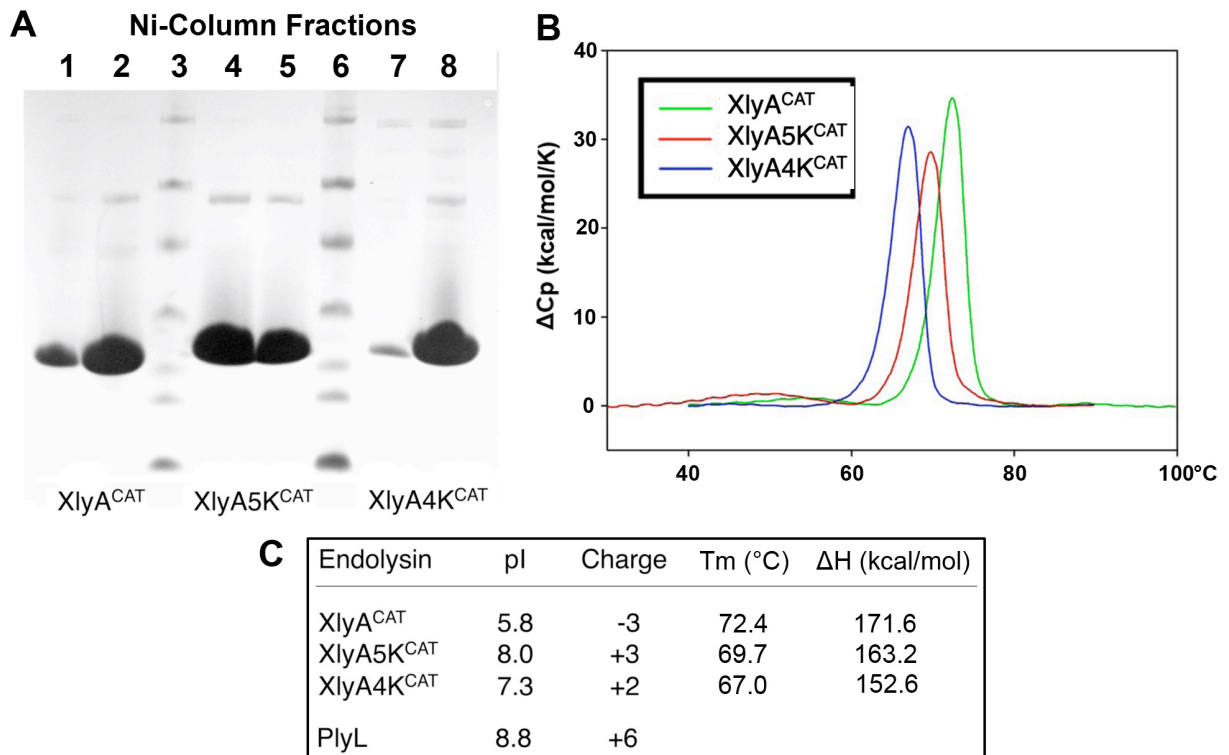

**Supplemental Fig. 2** Melting profiles of PlyL provides no evidence for significant interaction between the catalytic domain and CBD. Profile of full-length protein is not significantly different from the sum of domain profiles, as determined Differential Scanning Calorimetry.

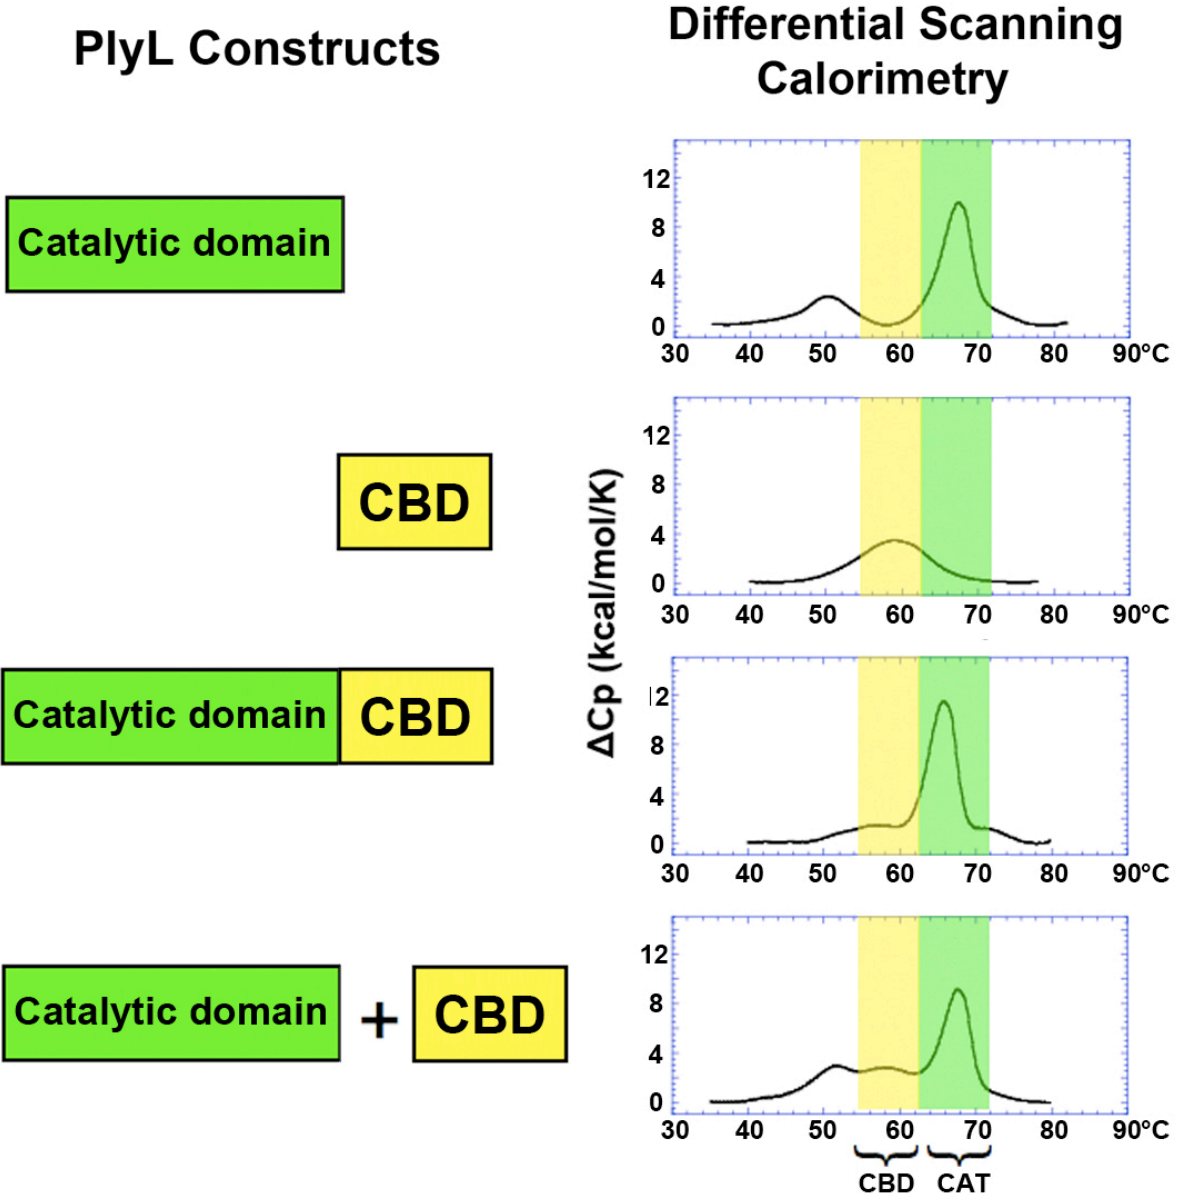

Supplement: supp_M111.244160_jbc.M111.244160-1.pdf [file supp_M111.244160_jbc.M111.244160-1.pdf]
